# Supplementary material for: Enhancing brain-machine interface (BMI) control of a hand exoskeleton using electrooculography (EOG)
Source: PubMed Central journal article supplement (PMC4274709; doi:10.1186/1743-0003-11-165), 2014-12-16

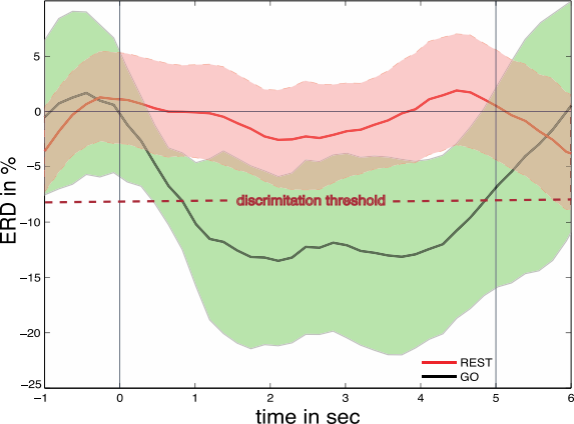

Supplement: 12984_2014_682_MOESM4_ESM.pdf [file 12984_2014_682_MOESM4_ESM.pdf]
